# Supplementary material for: Development of the 99mTc-Labelled SST2 Antagonist TECANT-1 for a First-in-Man Multicentre Clinical Study
Source: MDPI journal article supplement (doi:10.3390/pharmaceutics15030885), 2023-03-09

Supplementary

# Supplementary Materials: Development of the $^{99m}\text{Tc}$ -labelled SST<sub>2</sub>-receptor antagonist TECANT-1 for a first-in-man multi-centre clinical study

Novak Doroteja, Barbara Janota, Anton Amadeus Hörmann, Agnieszka Sawicka, Marko Kroselj, Alicja Hubalewska, Melpomeni Fani, Renata Mikolajczak, Petra Kolenc, Clemens Decristoforo, Piotr Garnuszek

Table of content

|                                                                                                                                                                                                                                     |   |
|-------------------------------------------------------------------------------------------------------------------------------------------------------------------------------------------------------------------------------------|---|
| <b>Table S1.</b> Properties of the radio-(RP)HPLC system.....                                                                                                                                                                       | 2 |
| <b>Table S2.</b> Properties of the iTLC system used for determination of the $^{99m}\text{Tc}$ -colloid species.....                                                                                                                | 2 |
| <b>Table S3.</b> Properties of the iTLC system used for determination of the $^{99m}\text{Tc}[\text{TcO}_4^-]$ .....                                                                                                                | 2 |
| <b>Table S4.</b> Lyophilisation scheme.....                                                                                                                                                                                         | 3 |
| <b>Table S5.</b> Summary of all tested parameters in development batches 05-07/20.....                                                                                                                                              | 3 |
| <b>Table S6.</b> Summary of initial $^{99m}\text{Tc}$ -labelling experiments of 2-vial kits (radiolabelling: RT, 30 min, 400 MBq $^{99m}\text{Tc}[\text{TcO}_4^-]$ ).....                                                           | 4 |
| <b>Table S7.</b> Mean value (n=3) of RCP determined by radio-(RP)HPLC and iTLC in dependence of the TECANT-1 content in development batches 05-07/20 (radiolabelling: RT, 30 min, ~600 MBq $^{99m}\text{Tc}[\text{TcO}_4^-]$ )..... | 4 |
| <b>Table S8.</b> Direct comparison of labelling batch 01B/21 using two different $^{99}\text{Mo}/^{99m}\text{Tc}$ -generators.....                                                                                                  | 4 |
| <b>Figure S1:</b> Representative radio-TLC chromatogram of $^{99m}\text{Tc}$ -TECANT-1 using 5 M ammonium acetate:methanol (1:1) ...                                                                                                | 5 |

**Table S1.** *Properties of the radio-(RP)HPLC system.*

| <b>radio-(RP)HPLC system</b> |                                                                                                                                |       |       |
|------------------------------|--------------------------------------------------------------------------------------------------------------------------------|-------|-------|
| Column                       | Kinetex® 2.6 µm PS C18, 100x2.1 mm 100 Å (Phenomenex, USA)                                                                     |       |       |
| Detection                    | UV-Vis (λ=220 nm): for identity and TECANT-1 assay<br>UV-Vis (λ=220 nm) and radiodetection: radiochemical purity determination |       |       |
| Injection volume             | 10 µL                                                                                                                          |       |       |
| Sample preparation           | 1:5 dilution of neutralized radiolabelling solution with water for injection                                                   |       |       |
| Eluents                      | A: 0.1% TFA in H <sub>2</sub> O<br>B: 0.1% TFA in ACN                                                                          |       |       |
| Gradient                     | Time (min)                                                                                                                     | A (%) | B (%) |
|                              | 0                                                                                                                              | 85    | 15    |
|                              | 5                                                                                                                              | 65    | 35    |
|                              | 6                                                                                                                              | 20    | 80    |
|                              | 6.1                                                                                                                            | 85    | 15    |
|                              | 10                                                                                                                             | 85    | 15    |
| Flow                         | 0.4 mL/min                                                                                                                     |       |       |
| Run time                     | 10 min                                                                                                                         |       |       |

**Table S2.** *Properties of the iTLC system used for determination of the <sup>99m</sup>Tc-colloid species.*

| <b>iTLC system</b>  |                                                                                                                                                              |
|---------------------|--------------------------------------------------------------------------------------------------------------------------------------------------------------|
| Stationary Phase    | iTLC – SG (Agilent Technology): approx. 9×1 cm                                                                                                               |
| Mobile Phase        | 5 M ammonium acetate buffer:methanol (1:1) (v/v)                                                                                                             |
| Radiodetection      | Radio detector: TLC plate reader (ScanRam, LABLogic, Broomhill, United Kingdom)<br>Radiochromatography software: Laura (LABLogic, Broomhill, United Kingdom) |
| Sample volume       | 5 µL                                                                                                                                                         |
| Sample preparation  | no specific sample preparation                                                                                                                               |
| Developing distance | 80 mm                                                                                                                                                        |
| Analysis time       | approx. 10 min                                                                                                                                               |

**Table S3.** *Properties of the iTLC system used for determination of the [<sup>99m</sup>Tc]TcO<sub>4</sub>.*

| <b>iTLC system</b>  |                                                                                                                                                               |
|---------------------|---------------------------------------------------------------------------------------------------------------------------------------------------------------|
| Stationary Phase    | iTLC – SG (Agilent Technology): approx. 9×1 cm                                                                                                                |
| Mobile Phase        | methyl ethyl ketone (MEK)                                                                                                                                     |
| Radiodetection      | Radio detector: iTLC plate reader (ScanRam, LABLogic, Broomhill, United Kingdom)<br>Radiochromatography software: Laura (LABLogic, Broomhill, United Kingdom) |
| Sample volume       | 5 µL                                                                                                                                                          |
| Sample preparation  | no specific sample preparation                                                                                                                                |
| Developing distance | 80 mm                                                                                                                                                         |
| Analysis time       | approx. 10 min                                                                                                                                                |

**Table S4.** *Lyophilisation scheme.*

| Parameter       | Section  |     |     |     |        |      |      |      |      |               |      |      |      |
|-----------------|----------|-----|-----|-----|--------|------|------|------|------|---------------|------|------|------|
|                 | Freezing |     |     |     | Drying |      |      |      |      | Second drying |      |      |      |
| Time [h]        | 2        | 1   | 1   | 2   | 0.25   | 2    | 0    | 1    | 5    | 5.75          | 0.3  | 0.6  | 2    |
| T [°C]          | -40      | -40 | -35 | -35 | -35    | -30  | -20  | -20  | 0    | 25            | 25   | 25   | 25   |
| Pressure [mbar] | /        | /   | /   | /   | 0.22   | 0.22 | 0.22 | 0.22 | 0.22 | 0.22          | 0.01 | 0.01 | 0.01 |

**Table S5.** *Summary of all tested parameters in development batches 05-07/20.*

| Batch No. | TECANT-1 [µg] | Number of labellings | Activity added [MBq] | Labelling pH | Incubation time [min] | RCP [%]   |
|-----------|---------------|----------------------|----------------------|--------------|-----------------------|-----------|
| 05/20     | 10            | 1                    | 623                  | 11           | 10                    | 98.8      |
|           |               | 5                    | 623-701              | 11           | 20                    | 95.5±0.7  |
|           |               | 5                    | 310-701              | 11           | 30                    | 93.9±4.8  |
| 06/20     | 15            | 5                    | 511-712              | 11           | 10                    | 97.7±0.1  |
|           |               | 5                    | 511-712              | 11           | 20                    | 96.4±0.7  |
|           |               | 5                    | 511-840              | 11           | 30                    | 95.5±1.2  |
|           |               | 1                    | 500                  | 8            | 10-30                 | 76.3-98.0 |
| 07/20     | 50            | 5                    | 555-640              | 11           | 10                    | 93.8±2.0  |
|           |               | 5                    | 555-640              | 11           | 20                    | 94.7±2.6  |
|           |               | 5                    | 555-1200             | 11           | 30                    | 95.8±2.2  |

**Table S6.** Summary of initial [ $^{99m}\text{Tc}$ ]Tc-labelling experiments of 2-vial kits (radiolabelling: RT, 30 min, 400 MBq [ $^{99m}\text{Tc}$ ]TcO $_4^-$ ).

| Batch No. | Production details            |                                                      |                        |                                                           |              |                                                 | Quality control results                               |                                                  |            |
|-----------|-------------------------------|------------------------------------------------------|------------------------|-----------------------------------------------------------|--------------|-------------------------------------------------|-------------------------------------------------------|--------------------------------------------------|------------|
|           | Vial 1                        |                                                      |                        | Vial 2                                                    |              |                                                 | %                                                     | %                                                |            |
|           | TECANT-2<br>[ $\mu\text{g}$ ] | SnCl $_2$ $\times$<br>2H $_2$ O<br>[ $\mu\text{g}$ ] | Sodium<br>citrate [mg] | Na $_2$ HPO $_4$ $\times$<br>12H $_2$ O [ $\mu\text{g}$ ] | NaOH<br>[mg] | NaH $_2$ PO $_4$ $\times$<br>2 H $_2$ O<br>[mg] | [ $^{99m}\text{Tc}$ ]Tc–<br>TECANT-2<br>(HPLC)<br>[%] | $^{99m}\text{Tc}$ -<br>colloid<br>species<br>[%] | RCP<br>[%] |
| 02a/20    | 10                            | 15                                                   | 0.13                   | 1.77                                                      | 0.4          | 1.6                                             | 70.5 $\pm$ 0.0                                        | 1.6 $\pm$ 0.2                                    | 68.9       |
| 02b/20    | 15                            | 15                                                   | 0.13                   | 1.77                                                      | 0.4          | 1.6                                             | 83.5 $\pm$ 0.1                                        | 4.3 $\pm$ 0.5                                    | 79.2       |
| 02c/20    | 15                            | 15                                                   | 0.13                   | 1.77                                                      | 0.4          | 1.6                                             | 86.7 $\pm$ 0.2                                        | 3.2 $\pm$ 0.6                                    | 83.5       |
| 03/20     | 15                            | 15                                                   | 0.13                   | 1.77                                                      | 0.4          | 1.6                                             | 79.2 $\pm$ 0.3                                        | 5.2 $\pm$ 1.1                                    | 74.0       |
| 04/20     | 10                            | 25                                                   | 0.13                   | 1.77                                                      | 0.4          | 1.6                                             | 57.7 $\pm$ 0.2                                        | n.d.                                             | 57.7       |

**Table S7.** Mean value ( $n=3$ ) of RCP determined by radio-(RP)HPLC and iTLC in dependence of the TECANT-1 content in development batches 05-07/20 (radiolabelling: RT, 30 min, ~600 MBq [ $^{99m}\text{Tc}$ ]TcO $_4^-$ ).

| Batch No. | Production<br>details         | Quality control results                          |                                                  |                                          |                |
|-----------|-------------------------------|--------------------------------------------------|--------------------------------------------------|------------------------------------------|----------------|
|           | TECANT-1<br>[ $\mu\text{g}$ ] | % [ $^{99m}\text{Tc}$ ]Tc–TECANT-1<br>(HPLC) [%] | [ $^{99m}\text{Tc}$ ]TcO $_4^-$ [%] <sup>a</sup> | % $^{99m}\text{Tc}$ -colloid species [%] | RCP [%]        |
| 05/20     | 10                            | 96.3 $\pm$ 0.2                                   | <1                                               | 4.8 $\pm$ 1.6                            | 91.7 $\pm$ 1.8 |
| 06/20     | 15                            | 94.5 $\pm$ 2.0                                   | <1                                               | 4.1 $\pm$ 0.4                            | 90.6 $\pm$ 1.7 |
| 07/20     | 50                            | 96.4 $\pm$ 1.1                                   | <1                                               | 5.1 $\pm$ 1.1                            | 91.4 $\pm$ 0.2 |

<sup>a</sup>Based on the results of iTLC method described in Table S3.**Table S8.** Direct comparison of labelling batch 01B/21 using two different  $^{99}\text{Mo}/^{99m}\text{Tc}$ -generators.

| Generator used              | Results (mean $\pm$ SD)                       |                                          |                  |
|-----------------------------|-----------------------------------------------|------------------------------------------|------------------|
|                             | % [ $^{99m}\text{Tc}$ ]Tc–TECANT-1 (HPLC) [%] | % $^{99m}\text{Tc}$ -colloid species [%] | RCP [%]          |
| Curium generator ( $n=8$ )  | 99.02 $\pm$ 0.55                              | 2.74 $\pm$ 0.77                          | 96.31 $\pm$ 0.89 |
| Polatom generator ( $n=3$ ) | 98.68 $\pm$ 0.53                              | 3.23 $\pm$ 0.29                          | 95.49 $\pm$ 0.26 |

**Figure S1:** Representative radio-TLC chromatogram of  $[^{99m}\text{Tc}]\text{Tc-TECANT-1}$  using 5 M ammonium acetate:methanol (1:1).

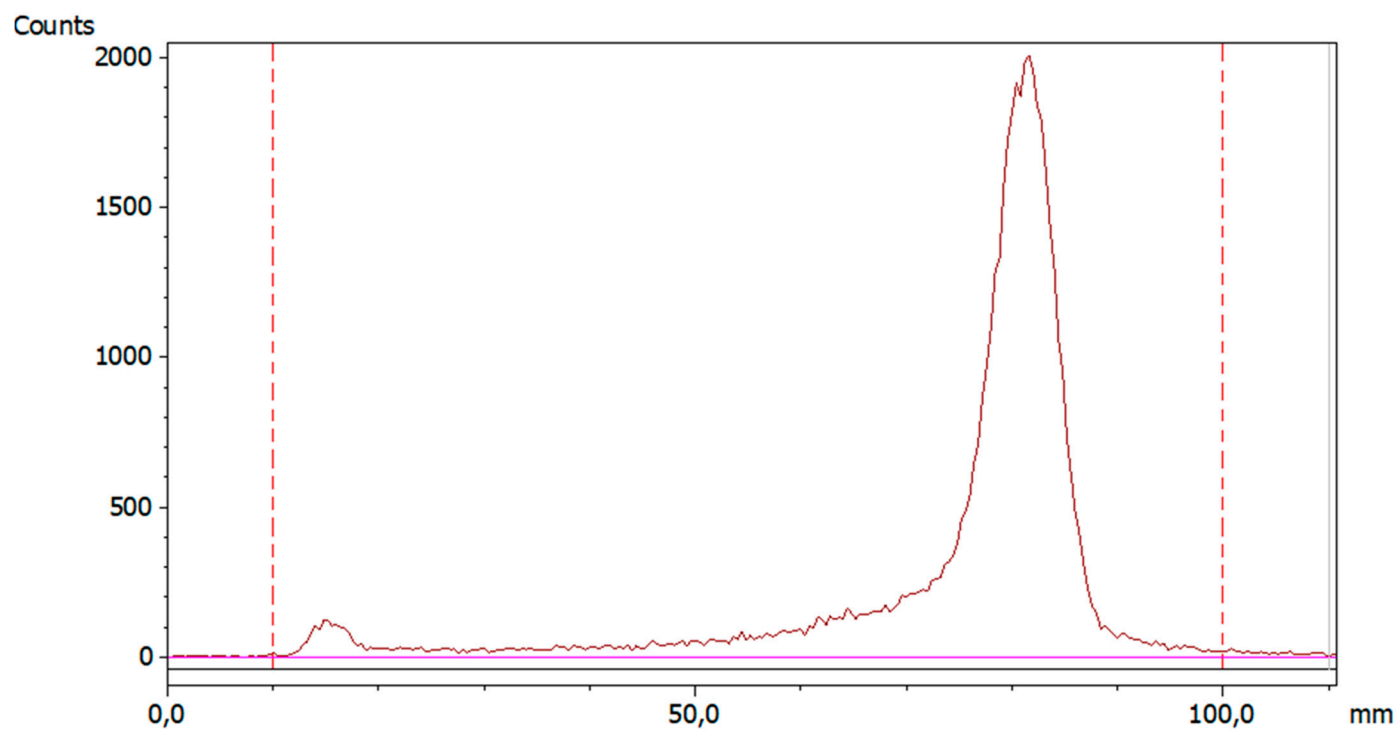

Supplement: s1 [file s1]
